# Supplementary material for: The legacy of larval infection on immunological dynamics over metamorphosis
Source: Philos Trans R Soc Lond B Biol Sci. 2019 Aug 26;374(1783):20190066. doi: 10.1098/rstb.2019.0066 (PMC6711287; doi:10.1098/rstb.2019.0066)
Supplement: Data [file rstb20190066supp2.xlsx]

## Sheet: metadata
Title	Data: The legacy of larval infection on immunological dynamics over metamorphosis
Experiment description	Young larval Tribolium castaneumbeetles were divided into treatments of exposure to Gregarina protozoan parasites. Larvae, pupae, and adults from each of the treatments were collected, and either sacrificed directly (whole) or had guts removed (guts). Both RNA and DNA were extracted using Qiagen Allprep kits. Gregarine infection was confirmed via PCR and qPCR on both aliquots. Host gene expressio…
Column legend
sample	A unique identifier for each sample
gregtreat	Whether or not the individual was exposed to parasites as a larva. 0 = no, 1 = yes
gregpositive	Whether or not PCR confirmed infection. 0 = no, 1 = yes
stage	larva, pupa, adult
tissue	gut or whole body (whole)
18s_ctmean	The mean RT-qPCR ct value of the reference gene technical replicates for each sample
gene target_ctmean	The mean RT-qPCR ct value of the target gene technical replicates for each sample
gene target_dct	The value of the reference gene ctmean minus the target gene dct
18s_ctmean_2	the 18s for the second plate if samples had to be re-run

## Sheet: data
sampleID	gregtreat	stage	tissue	18s_ctmean	18s_ctmean_2	def1_ctmean	ddc_ctmean	cpn3_ctmean	pgsc2_ctmean	pgLA_ctmean	pgLC_ctmean	duox_ctmean	tepB_ctmean	def1_dctmean	ddc_dctmean	cpn3_dctmean	pgsc2_dctmean	pgLA_dctmean	pgLC_dctmean	duox_dctmean	tepB_dctmean
1	1	larva	gut	9.72923	10.0073	31.9221	26.0482	33.1744	31.2484	32.8253	28.9185	34.5613	25.9488	-22.1928	-16.319	-23.4452	-21.5191	-22.8179	-18.9112	-24.5539	-15.9415
2	1	larva	gut	9.77669	10.1353	31.5215	29.2256	33.2162	30.615	31.2441	29.9337	33.5545	28.5615	-21.7448	-19.4489	-23.4395	-20.8383	-21.1088	-19.7984	-23.4192	-18.4262
3	1	larva	gut	9.18929	9.4817	31.0661	28.9226	33.1219	30.7201	29.6483	28.5301	30.6071	27.8192	-21.8768	-19.7333	-23.9326	-21.5308	-20.1666	-19.0484	-21.1254	-18.3375
4	1	larva	gut	10.583	11.8035	34.2416	36.8239	36.5321	34.0764	32.5343	32.8149	34.591	34.727	-23.6586	-26.2409	-25.949	-23.4933	-20.7308	-21.0114	-22.7875	-22.9235
5	1	larva	gut	13.4217	14.2734	38.4078	34.8261	36.8598	34.1264	34.4941	33.1315	39.886	35.3001	-24.9861	-21.4044	-23.4381	-20.7047	-20.2207	-18.8581	-25.6126	-21.0267
6	1	larva	gut	10.3	10.8232	32.0158	34.1275	35.8612	32.6993	32.0244	30.3771	32.3185	33.3478	-21.7158	-23.8275	-25.5611	-22.3993	-21.2012	-19.5539	-21.4953	-22.5246
7	0	larva	gut	9.11425	8.50531	30.9695	31.0841	32.2788	30.6073	28.5941	27.9718	28.7858	29.7385	-21.8553	-21.9699	-23.1646	-21.4931	-20.0887	-19.4664	-20.2805	-21.2332
8	0	larva	gut	15.5518	14.7794	34.2894	34.678	33.8402	34.1046	40	32.1515	33.9942	33.8655	-18.7376	-19.1262	-18.2885	-18.5528	-25.2206	-17.3721	-19.2148	-19.086
9	0	larva	gut	11.9145	12.0858	32.0233	34.0347	31.0398	30.3492	29.4362	29.0787	32.3003	29.4583	-20.1088	-22.1202	-19.1253	-18.4348	-17.3504	-16.9929	-20.2145	-17.3725
10	0	larva	gut	16.6033	16.5413	32.0046	32.5137	33.5552	33.4159	33.2086	31.412	33.8353	34.4187	-15.4013	-15.9104	-16.952	-16.8127	-16.6673	-14.8707	-17.2941	-17.8774
11	1	pupa	gut	13.1515		23.0026	36.8153	33.3949	34.7672	31.1145	31.457	32.0419	31.674	-9.85107	-23.6637	-20.2434	-21.6157	-17.963	-18.3055	-18.8904	-18.5224
12	1	pupa	gut	8.00128		24.7014	29.9075	31.4002	33.5605	26.0548	27.4784	28.9341	27.986	-16.7001	-21.9063	-23.3989	-25.5592	-18.0535	-19.4772	-20.9328	-19.9847
13	1	pupa	gut	11.7283		30.0171	35.2167	33.6368	34.5973	30.775	31.0953	31.2075	32.0043	-18.2888	-23.4884	-21.9086	-22.869	-19.0467	-19.367	-19.4792	-20.276
14	1	pupa	gut	14.3844		23.2325	33.2133	31.2406	32.5388	30.511	31.3121	31.5498	33.4053	-8.84808	-18.8289	-16.8563	-18.1545	-16.1267	-16.9277	-17.1654	-19.0209
15	1	pupa	gut	13.0155		24.8205	29.7685	30.2495	32.4473	28.0624	30.752	32.6289	34.2346	-11.805	-16.7529	-17.234	-19.4317	-15.0468	-17.7364	-19.6133	-21.2191
16	1	pupa	gut	9.71309		25.3097	30.6285	31.3232	32.4982	27.3899	28.6538	31.3443	26.122	-15.5966	-20.9154	-21.6101	-22.7851	-17.6768	-18.9407	-21.6312	-16.409
17	1	pupa	gut	9.08148		20.9975	33.4935	30.1194	29.8129	26.5022	26.561	28.41	27.0007	-11.916	-24.4121	-21.0379	-20.7314	-17.4207	-17.4795	-19.3286	-17.9192
18	0	pupa	gut	13.9988		24.5858	31.8819	33.844	32.5634	29.4992	32.4075	35.8485	33.6974	-10.587	-17.8831	-19.8453	-18.5646	-15.5004	-18.4087	-21.8497	-19.6986
19	0	pupa	gut	9.70973		21.9333	31.2541	31.0623	29.9669	27.6447	27.1975	31.1804	30.9804	-12.2236	-21.5443	-21.3526	-20.2571	-17.9349	-17.4877	-21.4706	-21.2707
20	0	pupa	gut	10.1587		22.4678	31.3868	31.3304	28.4177	26.7581	26.3104	30.5439	29.3419	-12.3092	-21.2282	-21.1718	-18.259	-16.5995	-16.1517	-20.3852	-19.1832
21	0	pupa	gut	9.33483		20.2402	32.0425	27.7915	31.7712	26.5699	27.5537	29.4166	31.0226	-10.9054	-22.7076	-18.4567	-22.4364	-17.2351	-18.2189	-20.0818	-21.6878
22	1	adult	gut	14.3698	13.6388	34.6321	34.2508	35.9104	33.6695	32.087	30.9568	31.9663	29.9158	-22.2716	-20.612	-20.9933	-22.2716	-17.7173	-16.5871	-17.5965	-15.546
23	1	adult	gut	13.0932	12.8553	27.326	34.4184	32.4655	32.702	30.4563	28.6716	31.0346	28.0911	-19.6101	-21.563	-14.4707	-19.6101	-17.3631	-15.5784	-17.9414	-14.9979
24	1	adult	gut	13.8201	13.4895	24.7559	30.9702	33.5189	33.8911	31.2445	30.5191	31.5665	28.8433	-20.0294	-17.4807	-11.2664	-20.0294	-17.4244	-16.699	-17.7464	-15.0232
25	1	adult	gut	13.6518	13.1405	29.0895	33.401	31.8256	33.0473	30.4924	29.8301	31.3065	29.3951	-18.6851	-20.2605	-15.949	-18.6851	-16.8406	-16.1783	-17.6547	-15.7433
26	1	adult	gut	11.3572	10.6488	30.2719	24.8208	27.5874	31.1345	28.2269	27.599	28.9854	25.0849	-16.9386	-14.172	-19.6231	-16.9386	-16.8697	-16.2417	-17.6281	-13.7277
27	1	adult	gut	14.156	13.1508	23.6559	35.0834	32.647	32.9199	30.6686	29.4543	31.2541	28.8926	-19.4962	-21.9326	-10.5051	-19.4962	-16.5126	-15.2983	-17.0981	-14.7365
28	1	adult	gut	12.5345	11.4879	26.3442	29.1127	32.6145	30.189	29.6425	28.5805	30.6694	26.6919	-21.1266	-17.6248	-14.8563	-21.1266	-17.108	-16.046	-18.1349	-14.1574
29	1	adult	gut	11.3892	11.1824	30.8312	28.3796	30.0341	30.8678	37.3151	28.2439	30.4453	26.1783	-18.8517	-17.1971	-19.6488	-18.8517	-25.9259	-16.8546	-19.0561	-14.7891
30	1	adult	gut	15.0359	14.4938	34.3714	34.5787	36.0639	33.8173	34.252	31.6448	30.7971	28.4027	-21.5701	-20.0848	-19.8775	-21.5701	-19.2161	-16.6089	-15.7612	-13.3668
31	0	adult	gut	14.3755	14.6907	30.2699	33.182	35.7764	33.6626	31.3177	27.9526	31.3588	28.6903	-21.0857	-18.4913	-15.5792	-18.972	-16.948	-13.5772	-16.9834	-14.3149
32	0	adult	gut	16.3386	15.7314	30.4299	34.9085	35.6011	34.4691	34.4194	30.618	31.6082	28.4775	-19.8697	-19.1771	-14.6984	-19.8697	-21.3262	-14.2794	-15.2696	-12.1389
33	0	adult	gut	15.0952	14.6721	32.457	33.1693	34.1697	32.4972	31.8034	30.2501	32.1878	29.7202	-19.4976	-18.4973	-17.785	-19.4976	-19.5375	-15.1549	-17.0926	-14.625
34	0	adult	gut	14.1302	12.8809	26.5209	32.4731	33.9898	31.5372	32.7538	29.6882	30.6428	27.9659	-21.1089	-19.5921	-13.6399	-21.1089	-18.9337	-15.5581	-16.5126	-13.8357
35	0	adult	gut	13.9531	12.4724	25.8059	32.2468	32.9479	34.3259	31.3526	30.0044	31.532	28.3002	-20.4755	-19.7744	-13.3335	-20.4755	-17.7008	-16.0514	-17.5789	-14.3471
36	1	larva	whole	11.5691		32.0088	32.1506	38.6135	33.1582	33.0703	31.7605	36.3307	31.5649	-20.4396	-20.5815	-27.0444	-21.5891	-21.5011	-20.1913	-24.7616	-19.9958
37	1	larva	whole	10.6146		31.1858	30.4917	37.0595	31.9498	31.1358	30.9315	35.6246	30.4557	-20.5711	-19.877	-26.4448	-21.3352	-20.5212	-20.3168	-25.01	-19.841
38	1	larva	whole	11.6738		29.6171	31.1096	36.347	32.316	31.7917	30.4206	34.8936	30.6806	-17.9433	-19.4358	-24.6732	-20.6422	-20.1179	-18.7468	-23.2199	-19.0068
39	1	larva	whole	9.19095		30.6569	27.2192	35.6402	31.3329	31.1215	30.9841	34.8904	31.0031	-21.4659	-18.0282	-26.4493	-22.142	-21.9305	-21.7931	-25.6995	-21.8121
40	1	larva	whole	9.99427		28.3895	30.2014	33.2505	30.4106	30.1622	28.9629	34.3648	28.5503	-18.3952	-20.2071	-23.2562	-20.4164	-20.1679	-18.9687	-24.3705	-18.556
41	1	larva	whole	9.96888		31.6438	28.9938	36.876	30.5968	30.4465	29.9073	36.129	29.1212	-21.6749	-19.0249	-26.9071	-20.6279	-20.4776	-19.9384	-26.1601	-19.1523
42	1	larva	whole	9.4195		31.9645	26.018	34.9321	30.5292	30.3711	30.1281	35.1819	28.5791	-22.545	-16.5985	-25.5126	-21.1097	-20.9516	-20.7086	-25.7624	-19.1596
43	1	larva	whole	10.1676		30.025	30.0009	37.9144	30.7713	30.956	29.8534	36.227	29.2312	-19.8574	-19.8333	-27.7468	-20.6037	-20.7884	-19.6858	-26.0594	-19.0636
44	0	larva	whole	9.31803		29.7792	29.7073	39.7163	31.7494	31.2708	30.0962	34.4407	29.7976	-20.4612	-20.3893	-30.3983	-22.4314	-21.9528	-20.7782	-25.1226	-20.4795
45	0	larva	whole	10.0808		26.931	29.0985	36.2782	29.9419	32.3043	30.5485	33.4344	29.9378	-16.8501	-19.0177	-26.1974	-19.8611	-22.2235	-20.4677	-23.3535	-19.857
46	0	larva	whole	9.66258		29.8497	28.5312	31.7498	28.2726	28.7588	28.5495	33.4458	29.1829	-20.1872	-18.8687	-22.0872	-18.61	-19.0963	-18.8869	-23.7832	-19.5203
47	0	larva	whole	9.66331		32.9048	30.8827	35.1244	32.0766	31.1837	30.0736	33.6699	29.3994	-23.2415	-21.2193	-25.4611	-22.4133	-21.5204	-20.4103	-24.0066	-19.7361
48	0	larva	whole	8.48443		28.6706	28.7893	33.5134	29.2192	28.549	27.4391	32.4671	27.6528	-20.1862	-20.3048	-25.029	-20.7348	-20.0645	-18.9547	-23.9827	-19.1684
49	0	larva	whole	10.0481		30.0192	30.2892	34.8752	31.3057	31.0225	29.7098	35.5438	29.592	-19.9712	-20.2412	-24.8271	-21.2576	-20.9744	-19.6617	-25.4957	-19.5439
50	0	larva	whole	11.6533		30.5975	30.7678	37.6746	31.6237	31.6699	30.481	35.6552	30.8901	-18.9442	-19.1145	-26.0213	-19.9704	-20.0166	-18.8277	-24.0018	-19.2368
51	0	larva	whole	9.1973		26.153	25.1775	35.4211	29.6677	30.044	30.0747	33.5738	30.4636	-16.9557	-15.9802	-26.2238	-20.4704	-20.8467	-20.8774	-24.3765	-21.2663
52	0	pupa	whole	11.4942		26.086	28.6044	35.1198	31.898	30.2607	30.107	33.7552	29.5328	-14.5917	-17.1101	-23.6256	-20.4037	-18.7665	-18.6127	-22.261	-18.0386
53	0	pupa	whole	12.6283		26.2382	27.7407	32.8356	30.3334	29.9214	30.6652	33.5442	30.8718	-13.6099	-15.1124	-20.2073	-17.7051	-17.2931	-18.0369	-20.9159	-18.2435
54	0	pupa	whole	14.2271		26.8387	30.3105	36.1607	34.0435	31.6381	32.8682	34.7482	31.8862	-12.6117	-16.0834	-21.9337	-19.8165	-17.4111	-18.6411	-20.5212	-17.6591
55	0	pupa	whole	11.0988		24.3234	29.8117	34.2988	31.8272	30.1981	30.1544	32.6631	29.028	-13.2246	-18.7129	-23.2001	-20.7284	-19.0993	-19.0556	-21.5643	-17.9292
56	0	pupa	whole	14.1838		30.0728	30.9644	35.7322	34.9066	33.6384	31.2703	35.3681	32.081	-15.889	-16.7806	-21.5484	-20.7228	-19.4546	-17.0865	-21.1843	-17.8972
57	0	pupa	whole	11.2053		27.5237	27.3662	32.0944	33.8349	30.7324	29.8596	33.4274	29.4367	-16.3184	-16.1609	-20.8891	-22.6296	-19.5271	-18.6543	-22.2221	-18.2314
58	0	pupa	whole	9.59719		24.4826	26.3695	30.8752	31.0805	29.1591	28.4177	31.7879	27.5263	-14.8854	-16.7723	-21.278	-21.4833	-19.5619	-18.8205	-22.1907	-17.9291
59	0	pupa	whole	11.636		25.6179	29.1936	31.8385	33.2043	31.7927	30.557	34.1724	29.6962	-13.9819	-17.5576	-20.2024	-21.5682	-20.1567	-18.921	-22.5364	-18.0601
60	0	pupa	whole	12.9036		30.3831	30.3763	33.7993	32.3783	30.0475	30.5514	35.2443	30.6628	-17.4795	-17.4727	-20.8958	-19.4747	-17.1439	-17.6478	-22.3407	-17.7593
61	0	pupa	whole	13.5059		27.9177	30.0912	34.3181	36.0301	32.8647	32.2177	36.1151	31.4971	-14.4119	-16.5854	-20.8123	-22.5242	-19.3588	-18.7119	-22.6093	-17.9912
62	1	pupa	whole	10.061		23.1946	24.2738	29.5994	31.2348	29.742	28.7258	31.0906	27.3682	-13.1336	-14.2128	-19.5384	-21.1739	-19.681	-18.6649	-21.0296	-17.3073
63	1	pupa	whole	10.4514		23.7105	26.402	28.2164	29.1219	28.5678	28.6076	30.9954	28.0928	-13.2591	-15.9505	-17.765	-18.6704	-18.1163	-18.1561	-20.5439	-17.6414
64	1	pupa	whole	11.3709		25.2163	29.7056	34.1725	32.4272	29.6794	29.657	33.8506	29.4786	-13.8454	-18.3347	-22.8016	-21.0563	-18.3085	-18.286	-22.4797	-18.1077
65	1	pupa	whole	11.6123		27.7709	29.354	33.9558	32.2088	32.2409	31.159	34.3134	28.9967	-16.1585	-17.7417	-22.3435	-20.5965	-20.6285	-19.5467	-22.7011	-17.3844
66	1	pupa	whole	10.5287		23.4074	29.2302	33.4833	32.5632	31.4577	29.9812	34.997	29.1648	-12.8787	-18.7014	-22.9546	-22.0344	-20.9289	-19.4525	-24.4682	-18.6361
67	1	pupa	whole	10.9893		26.0781	24.2932	31.0931	31.6956	29.6041	29.1286	32.9918	28.694	-15.0888	-13.3039	-20.1037	-20.7063	-18.6147	-18.1392	-22.0025	-17.7047
68	1	pupa	whole	10.5709		23.5977	25.1059	30.5135	30.2134	28.276	28.0262	32.7934	27.5215	-13.0268	-14.5349	-19.9426	-19.6425	-17.705	-17.4553	-22.2224	-16.9505
69	1	pupa	whole	12.5253		26.6607	29.3903	32.611	32.8131	31.1746	30.1463	33.955	30.0428	-14.1354	-16.865	-20.0857	-20.2878	-18.6493	-17.621	-21.4297	-17.5175
70	1	pupa	whole	12.3978		25.5944	27.4174	33.2316	33.5496	30.4892	30.3938	33.3832	29.6921	-13.1966	-15.0196	-20.8338	-21.1518	-18.0914	-17.996	-20.9854	-17.2943
71	1	pupa	whole	9.82477		24.8924	24.7694	29.1369	29.8585	28.6786	27.9821	31.0366	25.1801	-15.0676	-14.9446	-19.3121	-20.0337	-18.8539	-18.1574	-21.2118	-15.3553
72	1	adult	whole	11.423		28.5168	31.534	34.2094	34.1631	30.2754	29.261	33.8225	28.1257	-17.0938	-20.111	-22.7864	-22.7401	-18.8524	-17.838	-22.3995	-16.7027
73	1	adult	whole	11.1694		31.9445	29.0476	36.3915	32.9142	29.3542	28.5096	34.6727	26.9221	-20.7751	-17.8782	-25.222	-21.7448	-18.1848	-17.3402	-23.5033	-15.7527
74	1	adult	whole	11.7635		34.0437	28.784	32.6411	34.6489	28.5102	29.2009	35.1673	27.1925	-22.2802	-17.0205	-20.8776	-22.8855	-16.7467	-17.4374	-23.4038	-15.4291
75	1	adult	whole	11.907		31.644	29.9514	34.0058	33.0401	29.3489	29.3462	34.3439	27.8413	-19.7369	-18.0443	-22.0987	-21.133	-17.4418	-17.4392	-22.4368	-15.9343
76	1	adult	whole	10.458		31.7888	29.1222	36.3801	33.2371	29.3468	28.478	34.7081	26.9682	-21.3308	-18.6642	-25.9222	-22.7791	-18.8888	-18.02	-24.2501	-16.5103
77	1	adult	whole	9.40373		30.1692	27.393	31.3741	31.5812	27.9857	27.3469	32.0916	25.3164	-20.7654	-17.9893	-21.9704	-22.1775	-18.582	-17.9432	-22.6879	-15.9127
78	1	adult	whole	11.736		35.0966	29.994	33.6372	34.9134	31.0489	29.6078	34.5687	27.674	-23.3606	-18.258	-21.9012	-23.1774	-19.3129	-17.8717	-22.8327	-15.938
79	1	adult	whole	7.29176		28.9117	25.8575	32.6667	31.3978	27.2668	26.3093	31.1994	23.7382	-21.6199	-18.5657	-25.375	-24.1061	-19.975	-19.0175	-23.9076	-16.4465
80	1	adult	whole	12.1173		34.3545	28.039	35.3523	35.7017	30.0798	29.5254	34.701	25.8959	-22.2372	-15.9217	-23.2349	-23.5844	-17.9625	-17.4081	-22.5837	-13.7786
81	1	adult	whole	13.124		35.6471	33.8934	36.2515	32.9806	32.1422	31.6209	36.1422	29.6013	-22.523	-20.7694	-23.1275	-19.8566	-19.0182	-18.4969	-23.0181	-16.4772
82	0	adult	whole	14.2439		30.8976	31.3109	30.6885	32.1012	29.2031	30.4123	32.2772	30.146	-16.6537	-17.067	-16.4446	-17.8573	-14.9592	-16.1684	-18.0333	-15.9021
83	0	adult	whole	15.4393		36.5902	35.6391	40	33.4708	33.6826	33.0875	36.2735	30.9362	-21.1509	-20.1998	-24.5607	-18.0315	-18.2433	-17.6482	-20.8342	-15.4969
84	0	adult	whole	14.2558		36.0146	32.398	37.3479	40	32.6652	31.8803	40	30.4316	-21.7588	-18.1422	-23.0921	-25.7442	-18.4093	-17.6245	-25.7442	-16.1757
85	0	adult	whole	12.112		28.8998	27.7965	35.4167	33.4781	31.7151	29.9965	34.6248	28.816	-16.7878	-15.6846	-23.3047	-21.3661	-19.6031	-17.8845	-22.5128	-16.704
86	0	adult	whole	12.9241		30.4482	28.5757	34.9544	36.2586	32.2373	31.4824	34.3629	28.8413	-17.5241	-15.6516	-22.0303	-23.3345	-19.3132	-18.5583	-21.4388	-15.9172
87	0	adult	whole	13.3995		32.7798	29.3248	36.3476	33.1681	30.9102	31.7014	35.022	31.652	-19.3803	-15.9254	-22.9481	-19.7686	-17.5107	-18.3019	-21.6225	-18.2525
88	0	adult	whole	11.6805		31.7092	29.7025	36.8247	35.2394	31.1454	30.1987	36.1659	27.5171	-20.0287	-18.022	-25.1443	-23.5589	-19.4649	-18.5182	-24.4855	-15.8366
89	0	adult	whole	13.4457		34.1547	30.6723	35.2858	34.6022	32.1981	31.4687	35.4496	30.7609	-20.709	-17.2266	-21.8401	-21.1565	-18.7524	-18.023	-22.0039	-17.3152
90	0	adult	whole	11.6298		33.0768	28.0853	32.4134	33.6701	30.7486	30.8938	34.0161	28.578	-21.447	-16.4555	-20.7836	-22.0404	-19.1188	-19.2641	-22.3863	-16.9482
91	0	adult	whole	14.3826		36.157	29.1068	35.2718	35.0213	33.5732	32.4281	35.2753	30.4531	-21.7743	-14.7242	-20.8891	-20.6387	-19.1905	-18.0455	-20.8926	-16.0705
